# Supplementary material
Source: PubMed Central journal article supplement (PMC5706621)
Supplement: Suppl_Fig1.pdf [file Suppl_Fig1.pdf]

## Supplementary Data

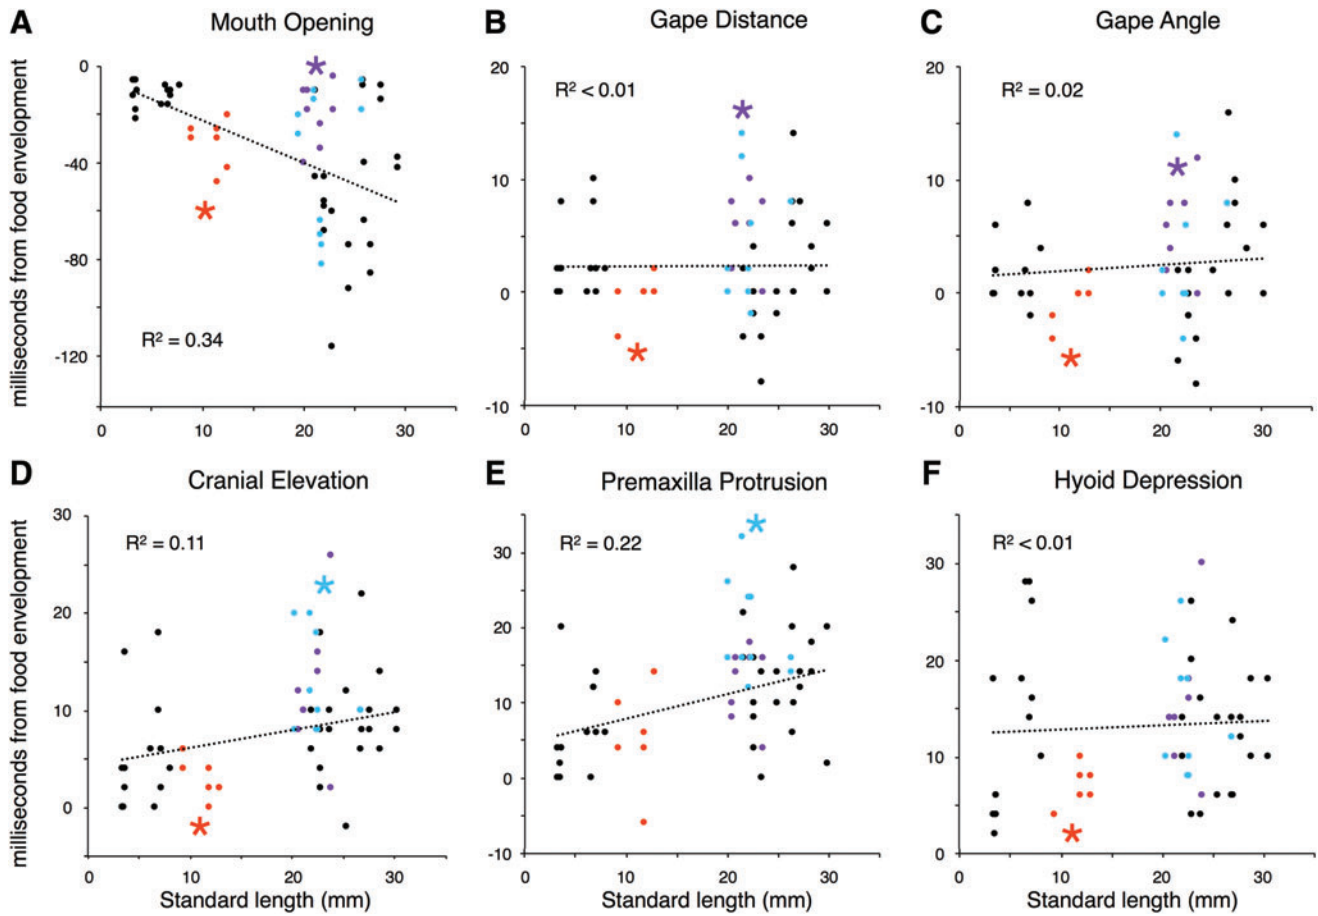

**SUPPLEMENTARY FIG. S1.** Trends in kinematic timing as fish grown and develop. Scatter plots show the relationships between fish size and the time between food envelopment and different kinematic events: (A) opening of the mouth, (B) maximum gape distance, (C) maximum gape angle, (D) maximum cranial elevation, (E) maximum premaxillary protrusion, and (F) maximum hyoid depression. Colors as in Figure 2. Dashed lines show best fit lines for WT samples only. Asterisks of corresponding colors indicate that a group differs significantly from values predicted by regression (paired  $t$  test,  $p < 0.05$ ). WT, wild type.
