# Supplementary material
Source: PubMed Central journal article supplement (PMC5706621)
Supplement: Suppl_Fig2.pdf [file Suppl_Fig2.pdf]

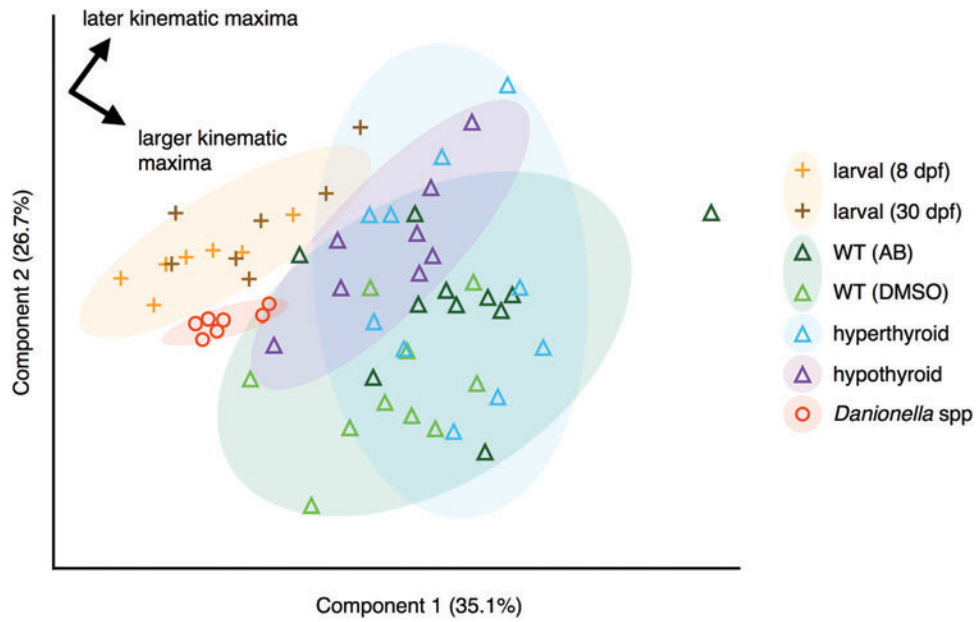

**SUPPLEMENTARY FIG. S2.** PCA of strike measurements with timing. PCA includes the measurement of each maximum excursion as well as the time at which each maximum excursion occurred, zeroed to the time at which the food was enveloped. The groups larval and WT contain pooled samples of 8 dpf (*light-orange plus signs*) with 30 dpf (*dark-orange plus signs*), and AB (*dark-green triangles*) and DMSO (*light-green triangles*), respectively. *Transparent ovals* show regions of 90% coverage for each group. DMSO, dimethyl sulfoxide; dpf, days postfertilization; PCA, principle components analysis.
